# Supplementary material
Source: ML conference proceedings conference paper supplement (https://proceedings.neurips.cc/paper_files/paper/2009/hash/92977ae4d2ba21425a59afb269c2a14e-Abstract.html)
Supplement: Supplementary file [file 92977ae4d2ba21425a59afb269c2a14e-Supplemental.zip]

---

# Supplementary material for the paper: Robust Nonparametric Regression with Metric-Space valued Output

---

**Matthias Hein**

Department of Computer Science, Saarland University  
Campus E1 1, 66123 Saarbrücken, Germany  
hein@cs.uni-sb.de

## 1 Missing Proof from Section 2

**Lemma 1** *Let  $N$  be a complete metric space such that  $d(x, y) < \infty$  for all  $x, y \in N$  and every closed and bounded set is compact. If  $\Gamma$  is  $(\alpha, s)$ -bounded and  $R'_\Gamma(x, q) < \infty$  for some  $q \in N$ , then*

- $R'_\Gamma(x, p) < \infty$  for all  $p \in N$ ,
- $R'_\Gamma(x, \cdot)$  is continuous on  $N$ ,
- The set of minimizers  $Q^* = \arg \min_{q \in N} R'_\Gamma(x, q)$  exists and is compact.

**Proof:** As  $\Gamma$  is monotonically increasing and convex, we have for any  $p, y \in N$ ,

$$\Gamma(d_N(p, y)) \leq \Gamma(d_N(p, q) + d_N(q, y)) \leq \frac{1}{2}[\Gamma(2d_N(p, q)) + \Gamma(2d_N(q, y))],$$

Moreover, since  $\Gamma$  is  $(\alpha, s)$ -bounded we have,

$$\Gamma(2x) \leq a\Gamma(x) \mathbf{1}_{x \geq s} + \Gamma(2s) \mathbf{1}_{x < s}.$$

Taking expectations with respect to  $Y|X = x$  we get,

$$R'_\Gamma(x, p) \leq \Gamma(2s) + \frac{a}{2}\Gamma(d_N(p, q)) + \frac{a}{2}R'_\Gamma(x, q).$$

Next, we show continuity of  $R'_\Gamma(x, \cdot)$ . Using Lemma 2 we get,

$$\begin{aligned} |R'_\Gamma(x, p) - R'_\Gamma(x, q)| &= |\mathbb{E}[\Gamma(d_N(p, Y)) - \Gamma(d_N(q, Y))]| \\ &\leq d(p, q) |\mathbb{E}[\max\{\Gamma'(d_N(p, Y)), \Gamma'(d_N(q, Y))\}]|. \end{aligned}$$

Now, for  $x \geq s$  we have  $\Gamma'(x) \leq \frac{\Gamma(2x) - \Gamma(x)}{x} \leq (a-1)\frac{\Gamma(x)}{s}$  and for  $x < s$ ,  $\Gamma'(x) \leq \Gamma'(s)$ . Thus

$$\mathbb{E}[\Gamma'(d_N(p, Y))] \leq \frac{(a-1)}{s} \mathbb{E}[\Gamma(d_N(p, Y))] + \Gamma'(s),$$

which shows using  $\max\{a, b\} \leq a + b$  the continuity of  $R'_\Gamma(x, \cdot)$ .

Finally, we consider the set  $S_\varepsilon = \{q \in N \mid R'_\Gamma(x, q) \leq \inf_{p \in N} R'_\Gamma(x, p) + \varepsilon\}$  which is closed since  $R'_\Gamma(x, \cdot)$  is continuous. Moreover, let  $q_1, q_2 \in S_\varepsilon$ , then

$$\Gamma(d_N(q_1, q_2)) \leq \Gamma(2s) + \frac{a}{2}\Gamma(d_N(q_1, y)) + \frac{a}{2}\Gamma(d_N(q_2, y)) \leq \Gamma(2s) + \frac{a}{2}R'_\Gamma(x, q_1) + \frac{a}{2}R'_\Gamma(x, q_2).$$

For  $x \geq s$  we have shown above  $x \leq (a-1)\frac{\Gamma(x)}{\Gamma'(x)} \leq \frac{\Gamma(x)}{\Gamma'(s)}$  and thus either  $d_N(q_1, q_2) \leq s$  or

$$d_N(q_1, q_2) \leq (a-1) \frac{\Gamma(2s) + \frac{a}{2}R'_\Gamma(x, q_1) + \frac{a}{2}R'_\Gamma(x, q_2)}{\Gamma'(s)},$$

which shows that the set  $S_\varepsilon$  is bounded and thus compact. It is non-empty since  $R'_\Gamma(x, \cdot)$  is continuous. The set of minimizers  $Q^* = \cap_{\varepsilon > 0} S_\varepsilon$  is compact and non-empty as it is the intersection of a nested sequence of non-empty, compact sets.  $\square$

## 2 Missing Proofs from Section 5 and 7

The supplementary material contains the proofs which due to space constraints could not be included into the paper. For convenience we restate here Assumptions (A1) from the paper.

### Assumptions (A1):

- $(X_i, Y_i)_{i=1}^l$  is an i.i.d. sample of  $P$  on  $M \times N$ ,
- $M$  and  $N$  are compact manifolds,
- The data-generating measure  $P$  on  $M \times N$  is absolutely continuous with respect to the natural volume element,
- The marginal density on  $M$  fulfills:  $p(x) \geq p_{\min}, \forall x \in M$ ,
- The density  $p(y, \cdot)$  is continuous on  $M$  for all  $y \in N$ ,
- The kernel fulfills:  $a 1_{s \leq r_1} \leq k(s) \leq b e^{-\gamma s^2}$  and  $\int_{\mathbb{R}^m} \|x\| k(\|x\|) dx < \infty$ ,
- The loss  $\Gamma : \mathbb{R}_+ \rightarrow \mathbb{R}_+$  is  $(\alpha, s)$ -bounded.

This proposition collects results from [1].

**Proposition 1** *Let  $M$  be a compact  $m$ -dimensional Riemannian manifold. Then, there exists  $r_0 > 0$  and  $S_1, S_2 > 0$  such that for all  $x \in M$  all balls  $B(x, r)$  with radius  $r \leq r_0$  it holds,*

$$S_1 r^m \leq \text{vol}(B(x, r)) \leq S_2 r^m.$$

Moreover, the cardinality  $K$  of a  $\delta$ -covering of  $M$  is upper bounded as,  $K \leq \frac{\text{vol}(N)}{S_1} \left(\frac{2}{\delta}\right)^m$ .

**Proposition 2** *Let the assumptions A1 hold, then if  $f$  is continuous we get for any  $x \in M \setminus \partial M$ ,*

$$\lim_{h \rightarrow 0} \int_M k_h(d_M(x, z)) f(z) dV(z) = C_x f(x),$$

where  $C_x = \lim_{h \rightarrow 0} \int_M k_h(d_M(x, z)) dV(z) > 0$ . If moreover  $f$  is Lipschitz continuous with Lipschitz constant  $L$ , then there exists a  $h_0 > 0$  such that for all  $h < h_0(x)$ ,

$$\int_M k_h(d_M(x, z)) f(z) dV(z) = C_x f(x) + O(h).$$

**Proof:** We denote by  $\text{inj}(M)$  the injectivity radius of  $M$ . As  $f$  is continuous for any  $\varepsilon > 0$ ,  $\exists \delta$  such that  $d(x, z) < \delta$  implies  $|f(x) - f(z)| < \varepsilon$ . Suppose that  $\varepsilon$  is chosen small enough, so that  $\delta < \text{inj}(M)$ ,

$$\begin{aligned} & \int_M k_h(d_M(x, z)) (f(z) - f(x)) dV(z) \\ & \leq \varepsilon \int_{B(x, \delta)} k_h(d_M(x, z)) dV(z) + 2 \|f\|_\infty \int_{M \setminus B(x, \delta)} k_h(d_M(x, z)) dV(z) \\ & \leq \varepsilon \int_{B(x, \delta)} k_h(\|y\|) dy + \|f\|_\infty \frac{\text{vol}(M)}{h^m} b e^{-\gamma \frac{\delta^2}{h^2}}, \end{aligned}$$

where we have introduced in the last step normal coordinates centered at  $x$  on  $B(x, \delta)$  so that  $d_M(x, z) = \|y\|$ . Note, that the second term is independent of  $\varepsilon$  and for each  $\delta > 0$  converges

to zero as  $h \rightarrow 0$ . Next, we note that the volume element on the ball  $B(x, \delta)$  can be upper bounded as,  $dV(y) = \sqrt{\det g}|_y dy \leq C dy$ . Thus,

$$\int_{B(x, \delta)} k_h(\|y\|) dV(y) \leq C \int_{B(x, \delta)} k_h(\|y\|) dy = C \int_{B(x, \frac{\delta}{h})} k(\|y'\|) dy' \leq C \int_{\mathbb{R}^m} k(\|y'\|) dy',$$

where we made the substitution  $y' = \frac{y}{h}$ . Note that thus the upper bound on the first term is independent of  $h$  and both terms can be made arbitrarily small. Finally, using Proposition 1, we get

$$\int_M k_h(d_M(x, z)) dV(z) \geq \frac{a}{h^m} \int_M 1_{d_M(x, z) \leq h r_1} dV(z) = \frac{a}{h^m} \text{vol}(B(x, h r_1)) \geq a S_1 r_1^m,$$

so that  $C_x = \lim_{h \rightarrow 0} \int_M k_h(d_M(x, z)) dV(z) > 0$ .

For Lipschitz continuous function  $f$  choose  $\delta = \text{inj}(M)$ . The second term on  $M \setminus B(x, \delta)$  can be treated as above noting that  $\frac{1}{h^m} e^{-\gamma \frac{\delta^2}{h^2}} \leq C_2 h$  for sufficiently small  $h$ . Moreover,

$$\begin{aligned} & \int_{B(x, \delta)} k_h(d_M(x, z)) |f(z) - f(x)| dV(z) \leq L \int_{B(x, \delta)} k_h(d_M(x, z)) d_M(x, z) dV(z) \\ & \leq L C_1 \int_{B(0, \delta)} k_h(\|y\|) \|y\| dy = h C_1 L \int_{B(0, \frac{\delta}{h})} k(\|y'\|) \|y'\| dy' \leq h C_1 L \int_{\mathbb{R}^m} k(\|y'\|) \|y'\| dy', \end{aligned}$$

where we again used normal coordinates  $y$  centered at  $x$  and the coordinate transformation  $y' = \frac{y}{h}$ . Moreover,  $\int_{\mathbb{R}^m} k(\|y'\|) \|y'\| dy' < \infty$  by assumption on the kernel function.  $\square$

**Lemma 2** *Let  $\phi : \mathbb{R}_+ \rightarrow \mathbb{R}$  be convex, differentiable and monotonically increasing. Then*

$$\min\{\phi'(x), \phi'(y)\} |y - x| \leq |\phi(y) - \phi(x)| \leq \max\{\phi'(x), \phi'(y)\} |y - x|.$$

**Proof:** Using the first order condition of a convex function and  $\phi(x) \leq \phi(y)$  for  $x \leq y$ ,

$$\begin{aligned} \phi(y) - \phi(x) &\geq \phi'(x)(y - x) \Rightarrow \phi(x) - \phi(y) \leq \phi'(x)(x - y), \\ \phi(x) - \phi(y) &\geq \phi'(y)(x - y) \Rightarrow \phi(y) - \phi(x) \leq \phi'(y)(y - x). \end{aligned}$$

The left part yields the lower bound and the right part the upper bound.  $\square$

## References

- [1] M. Hein. Uniform convergence of adaptive graph-based regularization. In G. Lugosi and H. Simon, editors, *Proc. of the 19th Conf. on Learning Theory (COLT)*, pages 50–64, Berlin, 2006. Springer.
